# Supplementary material for: Comparison of Read Mapping and Variant Calling Tools for the Analysis of Plant NGS Data
Source: MDPI journal article supplement (doi:10.3390/plants9040439), 2020-04-02

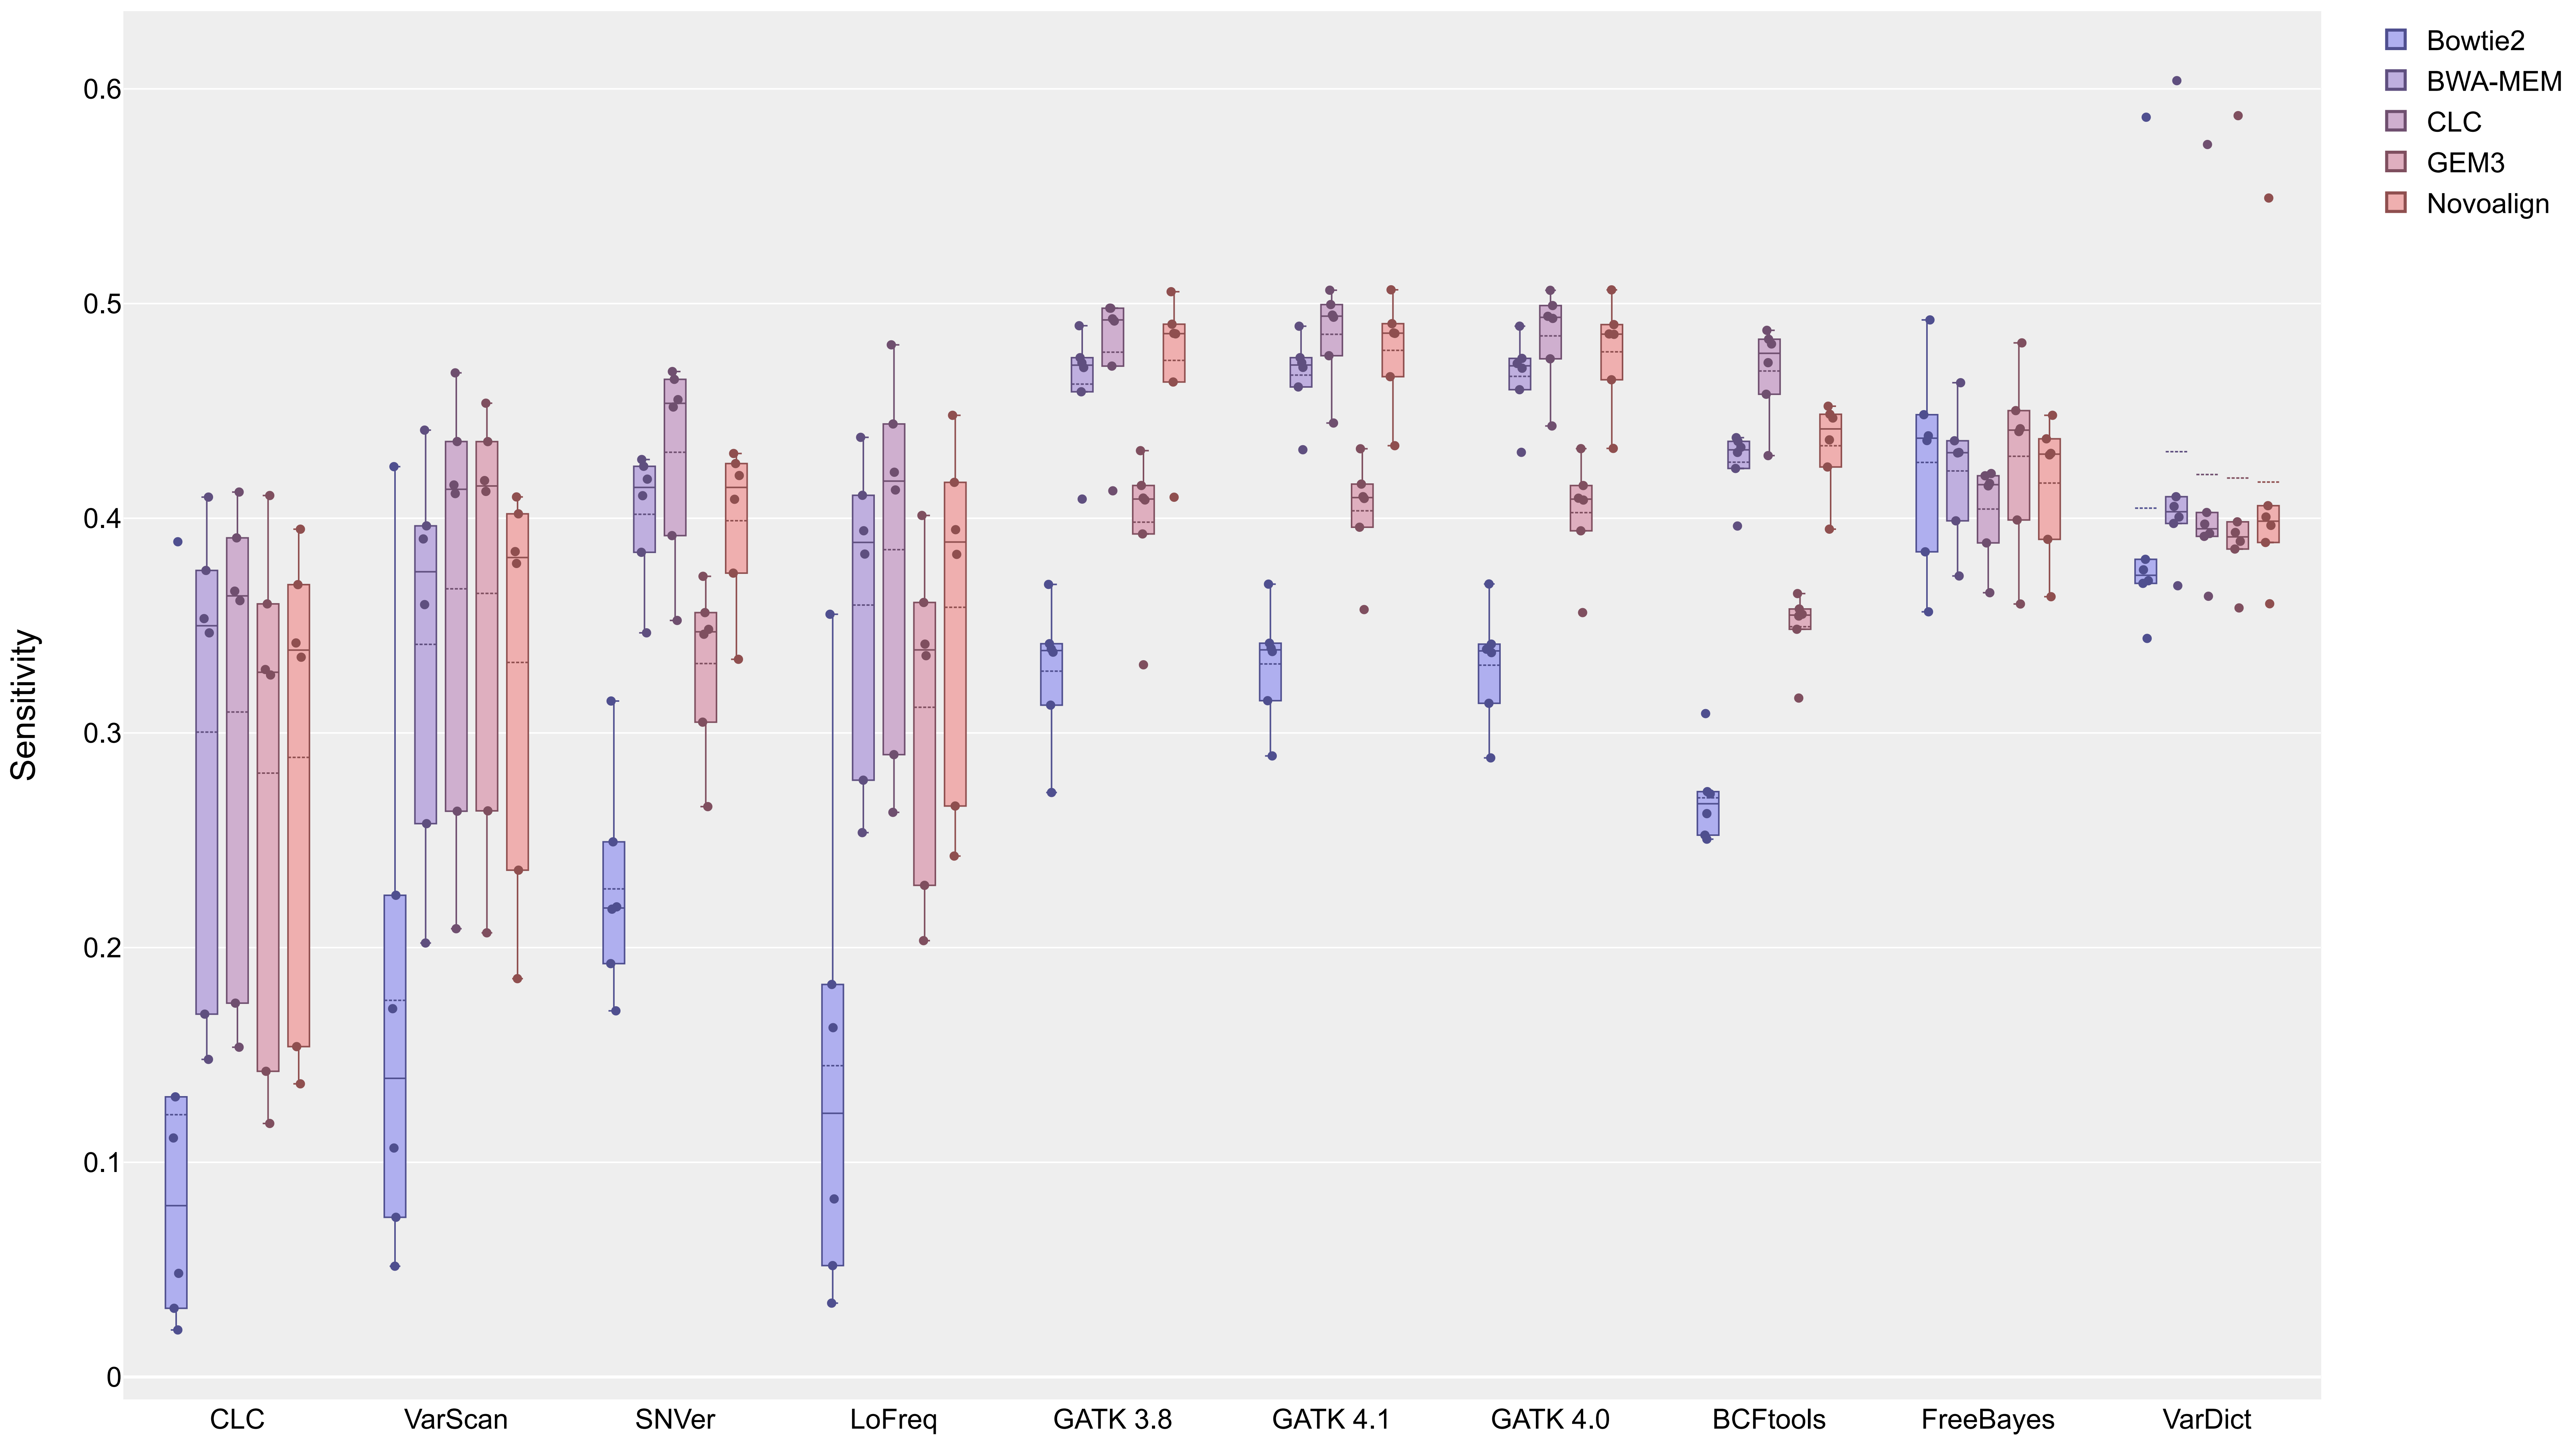

Supplement: s1 [file s1]
